# Supplementary material for: Pharmacological Validation of ASIC1a as a Druggable Target for Neuroprotection in Cerebral Ischemia Using an Intravenously Available Small Molecule Inhibitor
Source: Front Pharmacol. 2022 Mar 24;13:849498. doi: 10.3389/fphar.2022.849498 (PMC8988055; doi:10.3389/fphar.2022.849498)
Supplement: Supplementary file 1 [file DataSheet1.docx]

Title page

**Pharmacological validation of ASIC1a as a druggable target for neuroprotection in cerebral ischemia using an intravenously available small molecule inhibitor**

**Xin Qi1,2, Zi-Yue Huang2†, Yi-Jun Liu2†, Lu-Bing Cai2†, Xin-Lan Wen2, Xing-Lei Song1, Jian Xiong3, Pei-Yi Sun4, Hao Zhang5, Qin Jiang1, Ying Li1, Oleg Krishtal6, Leng-Chen Hou5, Jian-Fei Lu2, Michael Xi Zhu3*, Tian-Le Xu1, 2***

1Center for Brain Science of Shanghai Children's Medical Center, Shanghai Jiao Tong University School of Medicine, Shanghai 200127, China.

2Department of Anatomy and Physiology, Shanghai Jiao Tong University School of Medicine, Shanghai 200025, China.

3Department of Integrative Biology and Pharmacology, McGovern Medical School, The University of Texas Health Science Center at Houston, Houston, TX 77030, USA

4Department of Dermatology, Xinhua Hospital, Shanghai Jiao Tong University School of Medicine, Shanghai 200092, China.

5Department of Anesthesiology, Shanghai 10th People's Hospital, Tongji University School of Medicine, Shanghai 200072, China.

6Department of Cellular Membranology, Bogomoletz Institute of Physiology of NAS Ukraine, Kyiv 01024, Ukraine

†These authors have contributed equally to this work and share senior authorship.

*Co-corresponding authors.

Email: xu-happiness@shsmu.edu.cn (T.-L.X.) and michael.x.zhu@uth.tmc.edu (M.X.Z.)

Leading contact: xu-happiness@shsmu.edu.cn (T.-L.X.)

**Supplementary Table 1. Chemical and physical properties of C5b**

| **Property Name** | **Property Value** | **Standard** |
| --- | --- | --- |
| PubChem CID | 122177620 | - |
| Molecular Weight | 426.9 Da | < 450 Da |
| XLogP3-AA | 4.7 | 2~5 |
| Hydrogen Bond Donor Count | 2 | < 3 |
| Hydrogen Bond Acceptor Count | 5 | < 10 |
| Rotatable Bond Count | 9 | < 10 |
| Topological Polar Surface Area | 82.6 Å² | < 90 Å² |

XLogP3-AA represented water partition coefficient computed by XLogP3 3.0. Other properties were all computed by Cactvs 3.4.8.18.

**Supplementary Table 2. Pharmacokinetic characteristics of C5b**

| **Parameter** | **Units** | **i.v. 5 mg/kg** |
| --- | --- | --- |
| AUC(0-t) | hr•μg/L | 639.27±117.88 |
| AUC(0-∞) | hr•μg/L | 702.06±118.92 |
| t1/2z | hr | 6.49±2.82 |
| Vz | L/kg | 62.90±18.23 |
| CLz | L/hr/kg | 7.28±1.17 |
| MRT (0-∞) | hr | 6.57±2.64 |

AUC: area under the curve of C5b concentration in plasma; t1/2: terminal elimination half-life; V: apparent volume of distribution; CL: clearance rate; MRT: mean residence time.
